# Supplementary material
Source: ML conference proceedings conference paper supplement (https://openaccess.thecvf.com/content/CVPR2025/html/Zhou_TSP-Mamba_The_Travelling_CVPR_2025_paper.html)
Supplement: Supplementary file 1 [file Zhou_TSP-Mamba_The_Travelling_CVPR_2025_supplemental.pdf]

# TSP-Mamba: The Travelling Salesman Problem Meets Mamba for Image Super-resolution and Beyond – Supplementary Materials

Kun Zhou<sup>1</sup> Xinyu Lin<sup>2</sup> Jiangbo Lu<sup>1\*</sup>  
<sup>1</sup>SmartMore Corporation <sup>2</sup>SSE, CUHK-Shenzhen

kunzhou@link.cuhk.edu.cn, linxinyu0327@gmail.com, jiangbo.lu@gmail.com

## 1. More Ablation Studies

In this section, we will discuss more fine-grain designs and comprehensive ablated analysis of our proposed TSP-Mamba, including the choices of starting position, overlapped or non-overlapped window partition, TSP-LSTM without global 2D-SSM and other local scanning schemes (i.e., Hilbert, Zigzag and Z-shaped pipelines). Later on, we will further evaluate the impacts of either ablating TSP-LSTM or replacing it with window attentions.

**[a. Starting pos.:]** We compare our default top-left setup (TSP) with two counterparts starting from the center pixel (**TSP-C<sub>1</sub>** (1,1) and **TSP-C<sub>2</sub>** (2,2) for a 4×4 patch). TSP-C<sub>1,2</sub> yield similar results to our default version (termed as TSP). **[b. Partition:]** For efficiency, we use a *non-overlapping partition* scheme in TSP-LSTM. The overlapping version (**O-TSP**) shows only a slight improvement (0.02dB↑) but larger FLOPs. **[c. Multi TSP-LSTM (Multi-TSP-LSTM) without 2D-SSM:]** Stacking multiple TSP-LSTM layers may lack global modeling ability. As can be seen in Tab. below, Multi-TSP-LSTM gets degraded performance. This experiment underscores the necessity of integrating local TSP-LSTM with global 2D-SSM. **[d. Scanning:]** We trained three additional models replacing TSP with Hilbert, Zigzag, and Z-Shaped scanings. Results below show TSP (*content-adaptive*) outperforms the other three *content-invariant* scanning methods with only extra 0.8G FLOPs for building TSP paths. \*Models in **bold** use the TSP-Mamaba-Tiny structure (431K) but different scan strategies.

| Urban100 ×4   | TSP-C <sub>1</sub> | TSP-C <sub>2</sub> | O-TSP | Multi-TSP-LSTM | TSP   |
|---------------|--------------------|--------------------|-------|----------------|-------|
| PSNR (Param.) | 26.60              | 26.59              | 26.63 | 26.24(433K)    | 26.61 |
| FLOPs (G)     | 16.2               | 16.2               | 18.5  | 20.7           | 16.2  |

  

| Urban100 ×4   | Hilbert Scan | Zigzag     | Z-Shaped   | TSP        |
|---------------|--------------|------------|------------|------------|
| PSNR/FLOPs(G) | 26.49/15.4   | 26.41/15.4 | 26.49/15.4 | 26.61/16.2 |

We trained two additional models: (i) **M9**, which drops TSP-LSTM, (ii) **M10**, which replaces TSP-LSTM with 4 × 4 window attention. The results below show that M8 (default setting in Tab.3) is 0.48dB/0.12dB higher than M9 and M10.

\*Corresponding author

| Urban100 ×4     | M9 (no TSP-LSTM) | M10 (Win. Attn.) | M8 (TSP-LSTM) |
|-----------------|------------------|------------------|---------------|
| PSNR/SSIM       | 26.13/0.7881     | 26.49/0.7976     | 26.61/0.7992  |
| Param./FLOPs(G) | 398K / 12.1      | 442K / 21.7      | 431K / 16.2   |

## 2. Detailed Results of Classic SISR.

In our main paper, we report the averaged performance of different classic SISR methods, including SwinIR [4], SRFormer-L [5], HAT [1], RGT [2], MambaIR-L [3]. Here, we provide the detailed result on each benchmark.

| Class SISR (×2)    | Set5         | Set14        | BSD100       | Urban100     | Manga109     |
|--------------------|--------------|--------------|--------------|--------------|--------------|
| SwinIR             | 38.42        | 34.46        | 32.53        | 33.81        | 39.92        |
| SRFormer-L         | 38.51        | 34.44        | 32.57        | 34.09        | 40.07        |
| HAT                | <b>38.63</b> | <b>34.86</b> | <b>32.62</b> | 34.45        | 40.26        |
| RGT                | 38.59        | 34.83        | <b>32.62</b> | <b>34.47</b> | <b>40.34</b> |
| MambaIR-L          | 38.57        | 34.67        | 32.58        | 34.15        | 40.28        |
| <b>TSP-Mamba-L</b> | <b>38.78</b> | <b>35.09</b> | <b>32.69</b> | <b>34.70</b> | <b>40.64</b> |

  

| Class SISR (×3)    | Set5         | Set14        | BSD100       | Urban100     | Manga109     |
|--------------------|--------------|--------------|--------------|--------------|--------------|
| SwinIR             | 34.97        | 30.93        | 29.46        | 29.75        | 35.12        |
| SRFormer-L         | 35.02        | 30.94        | 29.48        | 30.04        | 35.26        |
| HAT                | 35.07        | 31.08        | 29.54        | 30.23        | 35.53        |
| RGT                | <b>35.15</b> | <b>31.13</b> | <b>29.55</b> | <b>30.28</b> | <b>35.55</b> |
| MambaIR-L          | 35.08        | 30.99        | 29.51        | 29.93        | 35.43        |
| <b>TSP-Mamba-L</b> | <b>35.26</b> | <b>31.49</b> | <b>29.58</b> | <b>30.54</b> | <b>35.94</b> |

  

| Class SISR (×4)    | Set5         | Set14        | BSD100       | Urban100     | Manga109     |
|--------------------|--------------|--------------|--------------|--------------|--------------|
| SwinIR             | 32.92        | 29.09        | 27.92        | 27.46        | 32.03        |
| SRFormer-L         | 32.93        | 29.08        | 27.94        | 27.68        | 32.21        |
| HAT                | 33.04        | <b>29.23</b> | <b>28.00</b> | 27.97        | 32.48        |
| RGT                | <b>33.12</b> | <b>29.23</b> | <b>28.00</b> | <b>27.98</b> | <b>32.50</b> |
| MambaIR-L          | 33.03        | 29.20        | 27.98        | 27.68        | 32.32        |
| <b>TSP-Mamba-L</b> | <b>33.31</b> | <b>29.57</b> | <b>28.05</b> | <b>28.24</b> | <b>33.00</b> |

## References

- [1] Xiangyu Chen, Xintao Wang, Wenlong Zhang, Xiangtao Kong, Yu Qiao, Jiantao Zhou, and Chao Dong. Hat: Hybrid attention transformer for image restoration. *arXiv preprint arXiv:2309.05239*, 2023. 1
- [2] Zheng Chen, Yulun Zhang, Jinjin Gu, Linghe Kong, and Xiaokang Yang. Recursive generalization transformer for image super-resolution. In *ICLR*, 2024. 1
- [3] Hang Guo, Jinmin Li, Tao Dai, Zhihao Ouyang, Xudong

Ren, and Shu-Tao Xia. Mambair: A simple baseline for image restoration with state-space model. *arXiv preprint arXiv:2402.15648*, 2024. [1](#)

- [4] Jingyun Liang, Jiezhang Cao, Guolei Sun, Kai Zhang, Luc Van Gool, and Radu Timofte. Swinir: Image restoration using swin transformer. In *Proceedings of the IEEE/CVF international conference on computer vision*, pages 1833–1844, 2021. [1](#)
- [5] Yupeng Zhou, Zhen Li, Chun-Le Guo, Song Bai, Ming-Ming Cheng, and Qibin Hou. Srformer: Permuted self-attention for single image super-resolution. In *Proceedings of the IEEE/CVF International Conference on Computer Vision*, pages 12780–12791, 2023. [1](#)
